# Supplementary material
Source: HighWire-hosted journal article supplement (http://ajnr-stage2.highwire.org/highwire/filestream/52744/field_highwire_adjunct_files/0/15-00019.pdf)
Supplement: 15-00019.pdf [file 15-00019.pdf]

**On-line Table: Baseline and outcome characteristics of the overall patients (N = 41) and the treatment group (n = 38<sup>a</sup>)**

|                                                                           | Total<br>(N = 41) | Bridging Therapy<br>(n = 17 <sup>a</sup> ) | IV Thrombolysis<br>(n = 21) | P Value |
|---------------------------------------------------------------------------|-------------------|--------------------------------------------|-----------------------------|---------|
| Age (median) (range)                                                      | 72 (17–89)        | 60 (38–86)                                 | 77 (17–89)                  | .041    |
| Male (No.)                                                                | 15 (36.6%)        | 5 (29.4%)                                  | 9 (42.8%)                   | .39     |
| Wake-up stroke (No.)                                                      | 22 (53.7%)        | 11 (64.7%)                                 | 10 (47.6%)                  | .29     |
| Unknown-onset stroke                                                      | 19 (46.3%)        | 6 (35.3%)                                  | 11 (52.4%)                  |         |
| Initial NIHSS (mean)                                                      | 14.5 ± 5.7        | 17.0 ± 4.9                                 | 12.0 ± 5.5                  | .007    |
| Risk factors (No.)                                                        | 35 (85.3%)        | 15 (88.2%)                                 | 18 (85.7%)                  | .95     |
| Initial variables                                                         |                   |                                            |                             |         |
| Systolic blood pressure (mm Hg) (mean)                                    | 154.2 ± 23.2      | 143.9 ± 24.1                               | 161.9 ± 20.0                | .017    |
| Diastolic blood pressure (mm Hg) (mean)                                   | 81.0 ± 16.0       | 81.1 ± 13.0                                | 78.4 ± 16.5                 | .59     |
| Blood glucose (mg/dL)<br>(median) (range)                                 | 7.6 (5.0–25.2)    | 7.1 (4.9–10.0)                             | 7.0 (5.0–13.6)              | .86     |
| Etiology (No.)                                                            |                   |                                            |                             |         |
| Atherothrombotic                                                          | 6 (14.6%)         | 2 (11.8%)                                  | 3 (14.3%)                   |         |
| Cardioembolic                                                             | 22 (53.7%)        | 8 (47.0%)                                  | 12 (57.1%)                  |         |
| Dissection                                                                | 4 (9.7%)          | 4 (23.5%)                                  | 0                           |         |
| Undetermined                                                              | 9 (22.0%)         | 3 (17.6%)                                  | 6 (28.6%)                   |         |
| ASPECTS (median) (range)                                                  | 8 (5–10)          | 7 (5–9)                                    | 8 (5–10)                    | .022    |
| ASPECTS >7 (No.)                                                          | 32 (78.0%)        | 12 (70.6%)                                 | 18 (85.7%)                  | .426    |
| Collateral blood flow                                                     | 31 (75.6%)        | 14 (82.3%)                                 | 14 (66.7%)                  | .46     |
| Delay (min) (median) (IQR)                                                |                   |                                            |                             |         |
| FAT to admission                                                          | 92 (71–124)       | 107 (66–156)                               | 92 (71–105)                 | .59     |
| LNT to treatment                                                          | 560 (375–735)     | 615 (347–775)                              | 480 (375–715)               | .56     |
| FAT to treatment                                                          | 190 (155–220)     | 195 (150–230)                              | 190 (175–220)               | .396    |
| Occluded artery                                                           | 36 (88.0%)        | 17                                         | 16                          |         |
| Successful recanalization (No.)<br>(on the patients with occluded artery) | 22/36 (61.0%)     | 14/17 (82.3%)                              | 7/16 (43.7%)                | .023    |
| Clinical outcome, 90-day                                                  |                   |                                            |                             |         |
| mRS ≤2                                                                    | 25 (61.0%)        | 13 (76.5%)                                 | 11 (52.4%)                  | .12     |
| Mortality                                                                 | 3 (7.3%)          | 1 (5.9%)                                   | 2 (9.5%)                    | 1       |
| sICH                                                                      | 2 (4.9%)          | 1 (5.9%)                                   | 1 (4.8%)                    | 1       |

**Note:**—IQR, indicates interquartile range; LNT, last-seen-normal time.

<sup>a</sup> For analysis comparing the group of patients according to the treatment (bridging group versus IVT group), we included 38 patients: 17 patients in the bridging therapy group and 21 in the IVT group. Three patients in the bridging therapy group were excluded because data of 2 patients were missing, and 1 patient was treated by mechanical thrombectomy alone.
